# Supplementary material
Source: publisher site journal article supplement (https://www.degruyter.com/publication/isbn/9783110225792/downloadAsset/9783110225792_Contents.pdf)
Supplement: Supplementary file 1 [file 9783110225792_Contents.pdf]

# Contents

## Citations and Abbreviations — VII

Ina Goy and Eric Watkins

### Introduction — 1

Part I.

### Kant's Theory of Biology and Research on Nature in the Seventeenth and Eighteenth Centuries

Mark Fisher

### Metaphysics and Physiology in Kant's Attitude towards Theories of Preformation — 25

Ina Goy

### Epigenetic Theories: Caspar Friedrich Wolff and Immanuel Kant — 43

Rachel Zuckert

### Organisms and Metaphysics: Kant's First Herder Review — 61

Part II.

### Kant's Theory of Biology—Commentaries on the "Critique of the Teleological Power of Judgment" and Other Writings

Luca Illetterati

### Teleological Judgment: Between Technique and Nature — 81

Predrag Šustar

### Kant's Account of Biological Causation — 99

Eric Watkins

### Nature in General as a System of Ends — 117

Angela Breitenbach

### Biological Purposiveness and Analogical Reflection — 131

Peter McLaughlin

**Mechanical Explanation in the “Critique of the Teleological Power of Judgment” — 149**

Marcel Quarfood

**The Antinomy of Teleological Judgment: What It Is and How It Is Solved — 167**

Philippe Huneman

**Purposiveness, Necessity, and Contingency — 185**

Ina Goy

**Kant’s Theory of Biology and the Argument from Design — 203**

Paul Guyer

**Freedom, Happiness, and Nature: Kant’s Moral Teleology  
(*CPJ* §§83–4, 86–7) — 221**

Ernst-Otto Onnasch

**The Role of the Organism in the Transcendental Philosophy of Kant’s  
*Opus postumum* — 239**

Part III.

**Kant’s Theory of Biology in the Present Time**

Hannah Ginsborg

**Oughts without Intentions: A Kantian Approach to Biological Functions — 259**

Siegfried Roth

**Kant, Polanyi, and Molecular Biology — 275**

**Bibliography — 293**

**Index of Names — 307**

**Index of Subjects — 311**

**Contributors — 319**
